# Supplementary material for: Presence and Quantity of Botanical Ingredients With Purported Performance-Enhancing Properties in Sports Supplements
Source: PubMed Central journal article supplement (PMC10352857; doi:10.1001/jamanetworkopen.2023.23879), 2023-07-17
Supplement: jamanetwopen-e2323879-s002.pdf [file jamanetwopen-e2323879-s002.pdf]

## Data Sharing Statement

Cohen. Presence and Quantity of Botanical Ingredients With Purported Performance-Enhancing Properties in Sports Supplements. *JAMA Netw Open*. Published July 17, 2023. doi:10.1001/jamanetworkopen.2023.23879

### Data

**Data available:** No

### Additional Information

**Explanation for why data not available:** Not applicable.
